# Supplementary material
Source: Research Square preprint supplement (doi:10.21203/rs.3.rs-9538581/v1)
Supplement: Supplementary file 1 [file 5504a311816de7a7f8a37286.pdf]

**COVID-19 VACCINE ACCEPTABILITY AMONGST PRIORITY GROUPS IN ZAMBIA**  
**CAVENDISH UNIVERSITY ZAMBIA & CENTRE FOR INFECTIOUS DISEASE RESEARCH IN ZAMBIA**

Focus Group Discussion Guide for Community Members

1. Briefly tell us about your community and where you live
2. What messages, if any, heard about COVID-19 and COVID-19 vaccination? [Probe: language, format, messaging, fora]
3. What are your thoughts on COVID-19 vaccination? [Probe: are they enthusiastic or reluctant to get vaccinated and why?]
4. What interactions and discussions have you had, if any, with the health staff or those involved in COVID-19 vaccination in order to share your views and those of the wider community? [Probe: how was it received? Did you get any response? Was there more you feel could have been done?]
5. What is the uptake of COVID-19 vaccination amongst your community members?
6. What else do you think can be done with regard to COVID-19 vaccination within your communities in order to get more people vaccinated?
7. Do you have any other thoughts you would like to share regarding this discussion?
