# Supplementary material
Source: Research Square preprint supplement (doi:10.21203/rs.3.rs-9538581/v1)
Supplement: Supplementary file 2 [file 6494127cd1c6a6430c7fa77d.pdf]

**COVID-19 VACCINE ACCEPTABILITY AMONGST PRIORITY GROUPS IN ZAMBIA**  
**CAVENDISH UNIVERSITY ZAMBIA & CENTRE FOR INFECTIOUS DISEASE RESEARCH IN ZAMBIA**

Key Informant Interview Schedule for Health Staff (National/Provincial/District/Health Facility)

1. Please briefly tell us about your position within the health sector and your involvement in COVID-19 activities
2. Regarding COVID-19 vaccination, what activities have you been involved in specifically?
3. What have been the successes and challenges with regards to these activities?  
[Probe: organisation, funding, human resource, service delivery, monitoring and evaluation,
4. Have you been vaccinated for COVID-19 as a health care worker [Probe: if yes, what convinced you to get vaccinated? If no, what discouraged you or prevented you from getting vaccinated?]
5. What is your perception of the willingness of other health care workers to get vaccinated against COVID-19? [Probe: what do you think are the reasons for this level of willingness]
6. How have the communities you interact with received the COVID-19 vaccine?  
[Probe: what have been the successes and challenges? Are there some members of the community that are more willing to get vaccinated for COVID-19 than others?]
7. What are the common misconceptions or myths that you have heard from communities regarding COVID-19 and COVID-19 vaccination?
8. Have you made any efforts to address the challenges you have faced and if so what strategies have you used?
9. What else do you think can be done with regard to COVID-19 vaccination in order to get more people vaccinated?
10. Do you have any other thoughts you would like to share regarding this discussion?
