# Supplementary material
Source: Research Square preprint supplement (doi:10.21203/rs.3.rs-9538581/v1)
Supplement: Supplementary file 3 [file af790981dd0e2777531aab4b.pdf]

**COVID-19 VACCINE ACCEPTABILITY AMONGST PRIORITY GROUPS IN ZAMBIA**  
**CAVENDISH UNIVERSITY ZAMBIA & CENTRE FOR INFECTIOUS DISEASE RESEARCH IN ZAMBIA**

Focus Group Discussion Guide for Community Networks (NHCs, Volunteers, Local leaders)

1. Briefly tell us about yourselves and your involvement with COVID-19 activities, if any
2. What messages, if any, have you delivered to the communities you interact with regarding COVID-19 and COVID-19 vaccination? [Probe: language, format, messaging, fora]
3. How have the communities you interact with or represent received news of COVID-19 vaccination? [Probe: are they enthusiastic or reluctant to get vaccinated and why]
4. What efforts have you made to address these challenges, myths and misconceptions?
5. What is the uptake of COVID-19 vaccination amongst community members?
6. What else do you think can be done with regard to COVID-19 vaccination in order to get more people vaccinated once the vaccine becomes available?
7. Do you have any other thoughts you would like to share regarding this discussion?
